# Supplementary material
Source: publisher figshare collection journal article supplement (https://frontiersin.figshare.com/ndownloader/files/28064262)
Supplement: Supplementary file 1 [file 28064262]

# Investigating the impact of cerium oxide nanoparticles upon the ecologically significant marine cyanobacterium *Prochlorococcus*

Craig J. Dedman,<sup>1,2\*</sup> Marwa M.I. Rizk,<sup>3</sup> Joseph A. Christie-Oleza,<sup>1,4,5\*</sup> Gemma-Louise Davies<sup>3\*</sup>

<sup>1</sup> School of Life Sciences, Gibbet Hill Campus, University of Warwick, Coventry, CV4 7AL, United Kingdom.

<sup>2</sup> Department of Chemistry, University of Warwick, Gibbet Hill, Coventry, CV4 7EQ, United Kingdom.

<sup>3</sup> UCL Department of Chemistry, University College London, 20 Gordon Street, London, WC1H 0AJ, United Kingdom.

<sup>4</sup> Department of Biology, University of the Balearic Islands, Ctra. Valldemossa, km 7.5. CP: 07122, Palma, Spain.

## \* Correspondence:

Corresponding Authors; c.dedman@warwick.ac.uk; gemma-louise.davies@ucl.ac.uk; joseph.christie@uib.eu

**Keywords:** *Prochlorococcus*, Ecotoxicology, Nanomaterials, Cerium oxide, Marine pollution, Phytoplankton

## Supplementary Information

### SI.1 Pro99 Media

To culture *Prochlorococcus* sp. MED4, cyanobacteria were grown in Pro99 media.<sup>1</sup> Briefly, media was prepared as follows; to 500 mL autoclaved and filtered natural oligotrophic seawater, 0.8 mL NH<sub>4</sub>Cl (0.5 M), 1 mL NaH<sub>2</sub>PO<sub>4</sub>•H<sub>2</sub>O (0.025 M) and 50 µL trace metal stock was added and mixed by inversion three times. Each component was filter sterilized using a 0.02 µm filter prior to addition to seawater. Ionic strength of the NSW used during experiments are within the range of natural seawater in relevant regions (~40-60 mS).<sup>2</sup>

### SI.2. Characterisation of nCeO<sub>2</sub>: Additional Information

#### SI.2.1 TEM primary particle size distribution

As described in section 2.2 (main text), nCeO<sub>2</sub> were imaged using transmission electron microscopy (TEM). To determine primary particle size, the diameter of 100 nanoparticles was measured using Image J v.3.2 software. The size distribution of primary nCeO<sub>2</sub> particles is presented in Fig SI.1.

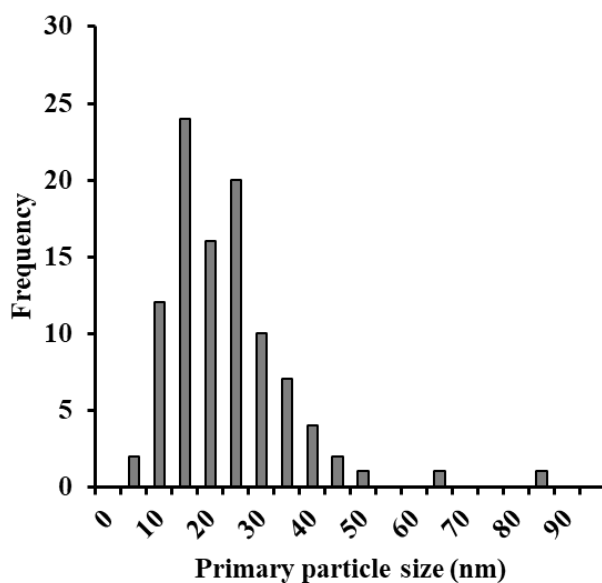

Figure SI.1. Size distribution histogram (diameter) of primary nCeO<sub>2</sub> particles measured using Image J v.3.2 software (n=100).

### SI.2.2 UV-vis spectrophotometry

UV-visible spectra (Fig SI.2) were collected using an Agilent Cary 60 UV-vis spectrophotometer of a sample of 100 mg L<sup>-1</sup> nCeO<sub>2</sub> in MilliQ ultrapure water.

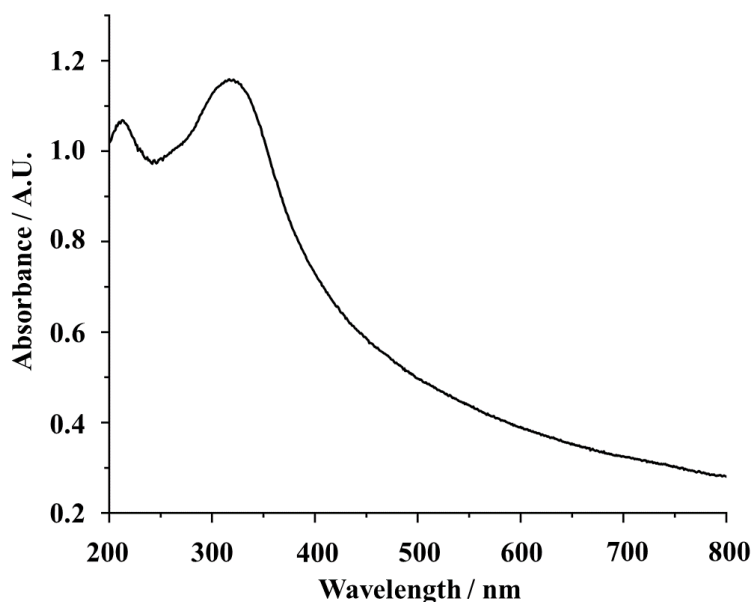

Figure SI.2. UV-vis spectra of nCeO<sub>2</sub> utilised in experimental work.

### SI.2.3 DLS Additional results

#### a) Count rate data

Dynamic light scattering (DLS) was carried out on nCeO<sub>2</sub> (1 and 100 mg L<sup>-1</sup>) added to NSW as described in section 2.2 (main text). The mean count data obtained at each timepoint during the 240-h experiment is presented in Table SI.1.

**Table SI.1. Mean count rate recorded during DLS analysis of nCeO<sub>2</sub> in NSW**

| Time (h) | Mean Count Rate (kcps) |                        |
|----------|------------------------|------------------------|
|          | 1 mg L <sup>-1</sup>   | 100 mg L <sup>-1</sup> |
| 0        | 311 ± 35               | 225 ± 90               |
| 1        | 255 ± 51               | 207 ± 150              |
| 2        | 208 ± 108              | 226 ± 85               |
| 4        | 256 ± 65               | 117 ± 12               |
| 24       | 229 ± 26               | 214 ± 136              |
| 48       | 189 ± 112              | 172 ± 55               |
| 72       | 299 ± 114              | 246 ± 176              |
| 168      | 178 ± 118              | 223 ± 70               |
| 240      | 249 ± 100              | 108 ± 54               |

#### b) Sedimentation images

During DLS analysis, nCeO<sub>2</sub> was observed to precipitate out of the water column at both test concentrations. Deposited material was visible by eye (Fig SI.3) after 24 h and continued to be evident throughout the 240-h experiment.

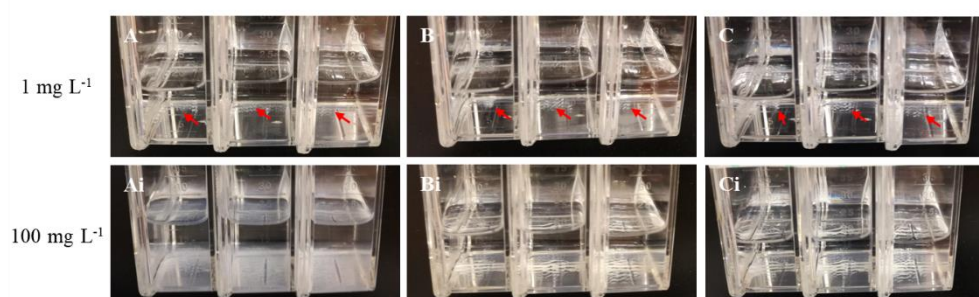

Figure SI.3. Photographic observation of nCeO<sub>2</sub> (1 and 100 mg L<sup>-1</sup>) sedimentation during DLS analysis; A – 24 h, B – 168 h, C – 240 h. Red arrows indicate where deposited material is not immediately obvious in 1 mg L<sup>-1</sup> samples.

### SI.3 Toxicity testing: Initial cell density

Short- (72 h) and extended (240 h) exposures were utilized to examine the effect of nCeO<sub>2</sub> exposure upon the marine cyanobacterium *Prochlorococcus* sp. MED4 (sections 2.3 and 2.4, main text). A summary of experimental conditions used in this work is provided in Table SI.2.

**Table SI.2. Experimental conditions summary for toxicity testing with *Prochlorococcus* sp. MED4**

| Experiment                      | Exposure length (h) | Media | nCeO <sub>2</sub> concentration                                        | Initial cell density (cells mL <sup>-1</sup> ) |
|---------------------------------|---------------------|-------|------------------------------------------------------------------------|------------------------------------------------|
| Short-term (section 2.3)        | 72                  | NSW   | 0, 1, 10 and 100 µg L <sup>-1</sup>                                    | 2.8 x 10 <sup>4</sup>                          |
| Short-term (section 2.3)        | 72                  | Pro99 | 0, 1, 10 and 100 µg L <sup>-1</sup>                                    | 8.9 x 10 <sup>5</sup>                          |
| Extended exposure (section 2.4) | 240                 | NSW   | 0, 1, 10 and 100 µg L <sup>-1</sup> ; 1, 10 and 100 mg L <sup>-1</sup> | 1.7 x 10 <sup>5</sup>                          |
| Extended exposure (section 2.4) | 240                 | Pro99 | 0, 1, 10 and 100 µg L <sup>-1</sup> ; 1, 10 and 100 mg L <sup>-1</sup> | 6.6 x 10 <sup>5</sup>                          |

### SI.4 Fluorescent microscopy: additional images

Fluorescent microscopy was utilized to examine the occurrence of hetero-aggregation between nCeO<sub>2</sub> and cyanobacteria (section 2.5, main text). The entrapment of cyanobacteria within large aggregates of nCeO<sub>2</sub> could be seen in both NSW and Pro99 media. Additional images to supplement those presented in Fig 5 (main text) are presented in Fig SI.4.

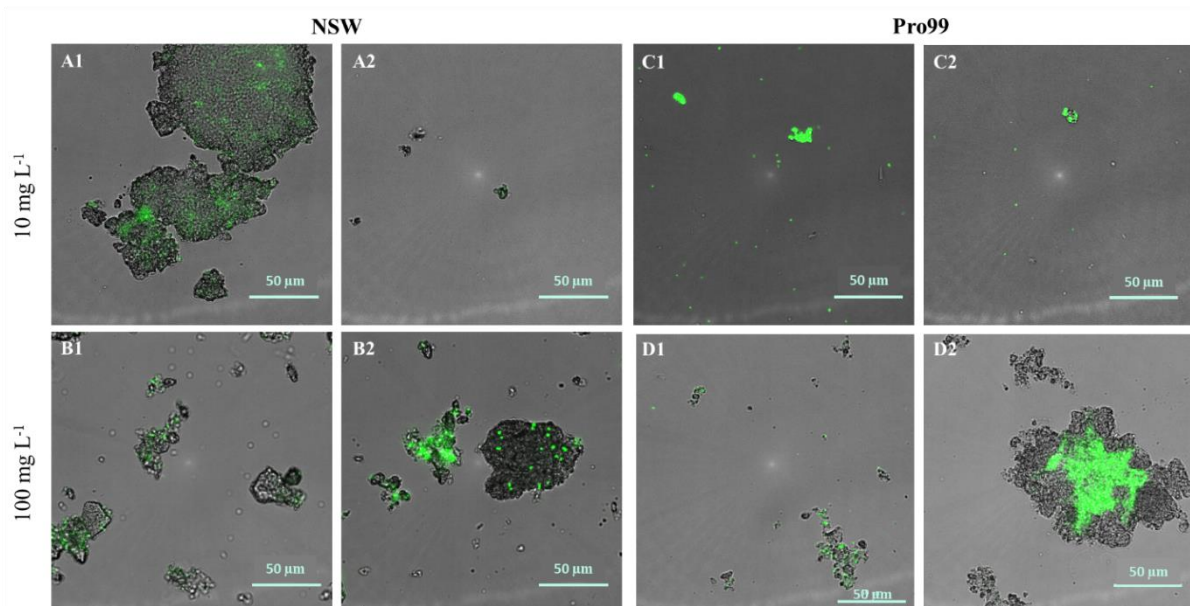

Figure SI.4. Hetero-aggregation of *Prochlorococcus* sp. MED4 (green) and nCeO<sub>2</sub> (10 and 100 mg L<sup>-1</sup>) formed in natural oligotrophic seawater (A; 10 mg L<sup>-1</sup> and B; 100 mg L<sup>-1</sup>) and Pro99 media (C; 10 mg L<sup>-1</sup> and D; 100 mg L<sup>-1</sup>). Images were captured using fluorescent microscopy under brightfield and GFP fluorescent and subsequently were merged.

### SI.5 References

1. Moore, L. R.; Post, A. F.; Rocap, G.; Chisholm, S. W., Utilization of different nitrogen sources by the marine cyanobacteria *Prochlorococcus* and *Synechococcus*. *Limnology and Oceanography* **2002**, 47 (4), 989-996.
2. Tyler, R. H.; Boyer, T. P.; Minami, T.; Zweng, M. M.; Reagan, J. R., Electrical conductivity of the global ocean. *Earth Planets Space* **2017**, 69, 156.
